# Supplementary material
Source: PubMed Central journal article supplement (PMC7687950)
Supplement: boe-11-11-6324-s001.pdf [file boe-11-11-6324-s001.pdf]

## Non-invasive *in situ* monitoring of bone scaffold activity by speckle pattern analysis: supplement

VAHIDEH FARZAM RAD,<sup>1</sup> MAJID PANAHI,<sup>2</sup>  RAMIN JAMALI,<sup>1</sup>   
AHMAD DARUDI,<sup>2</sup>  AND ALI-REZA MORADI<sup>1,3,\*</sup> 

<sup>1</sup>Department of Physics, Institute for Advanced Studies in Basic Sciences (IASBS), Zanjan 45137-66731, Iran

<sup>2</sup>Department of Physics, Faculty of Science, University of Zanjan, Zanjan 45371-38791, Iran

<sup>3</sup>School of Nano Science, Institute for Research in Fundamental Sciences (IPM), Tehran 19395-5531, Iran

\*[moradika@iasbs.ac.ir](mailto:moradika@iasbs.ac.ir)

---

This supplement published with The Optical Society on 14 October 2020 by The Authors under the terms of the [Creative Commons Attribution 4.0 License](https://creativecommons.org/licenses/by/4.0/) in the format provided by the authors and unedited. Further distribution of this work must maintain attribution to the author(s) and the published article's title, journal citation, and DOI.

Supplement DOI: <https://doi.org/10.6084/m9.figshare.13058198>

Parent Article DOI: <https://doi.org/10.1364/BOE.401740>

---

## Supplemental Document

### Non-invasive *in situ* monitoring of bone scaffold activity by speckle pattern analysis

Vahideh Farzam Rad<sup>1</sup>, Majid Panahi<sup>2</sup>, Ramin Jamali<sup>1</sup>, Ahmad Darudi<sup>2</sup>,  
Ali-Reza Moradi<sup>1,3,\*</sup>

<sup>1</sup> Department of Physics, Institute for Advanced Studies in Basic Sciences (IASBS),  
Zanjan 45137-66731, Iran

<sup>2</sup> Department of Physics, Faculty of Science, University of Zanjan, 45371-38791, Zanjan

<sup>3</sup> School of Nano Science, Institute for Research in Fundamental Sciences (IPM), Tehran  
19395-5531, Iran

\*Corresponding author: [moradika@iasbs.ac.ir](mailto:moradika@iasbs.ac.ir)

#### **Supplementary Figure S1**

Time history speckle pattern (THSP) of the sample in controlling experiment.

#### **Supplementary Figure S2**

3D plot and 2D map of COM matrix associated with the THSPs of the sample in controlling experiment.

#### **Supplementary Figure S3**

IM, Skewness, and AC parameters associated with the sample in controlling experiment.

#### **Supplementary Figure S4**

Average Roughness, Root Mean Square, and Kurtosis parameters of the samples.

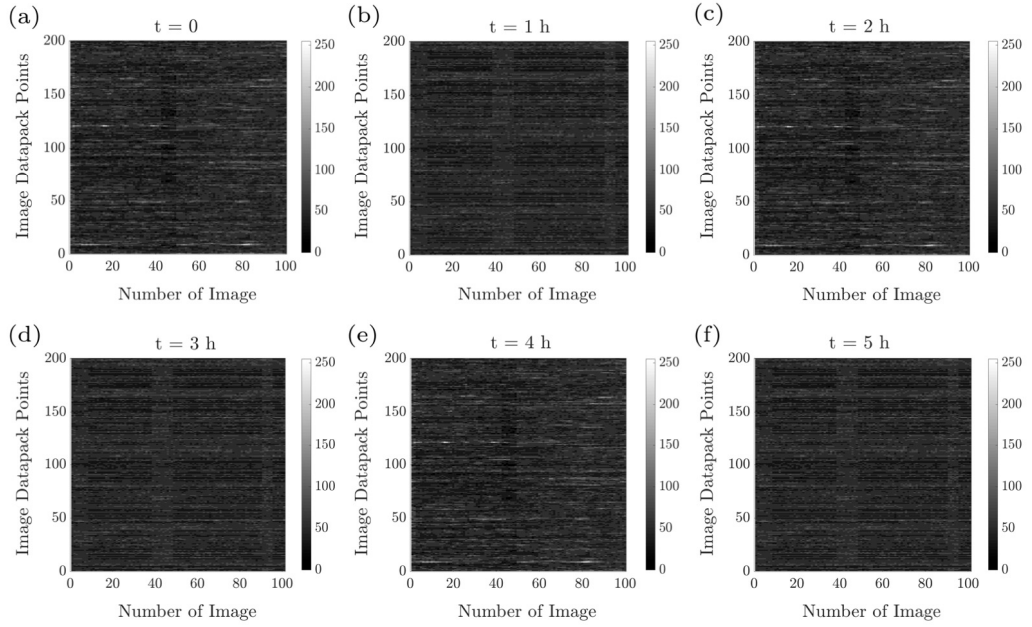

Figure S1: Time history speckle pattern (THSP) of the sample in controlling experiment. THSP matrices are built by tracking 200 random points throughout a collection of 100 speckle patterns of an empty sample at (a) the beginning of the experiment, and (b)  $t=1$  h, (c)  $t=2$  h, (d)  $t=3$  h, (e)  $t=4$  h, and (f)  $t=5$  h after the experiment starts.

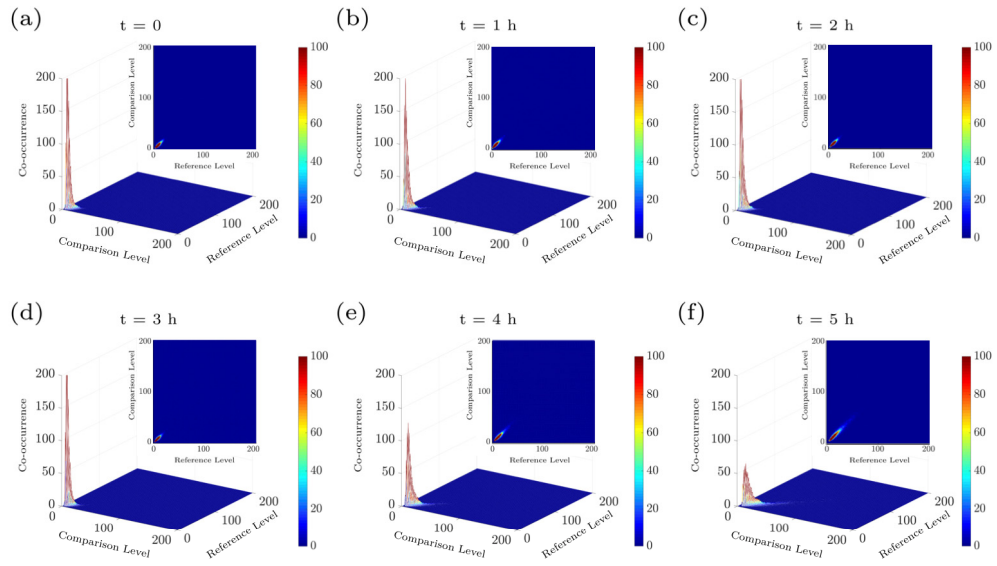

Figure S2: (a-f) 3D plot and 2D map of COM matrix, associated with the THSP matrices of controlling experiment (Fig. S1) at every 1 h after the experiment starts (a-f). Reference level and comparison level show intensity levels of  $i$  and  $j$  in Eq. 1, respectively.

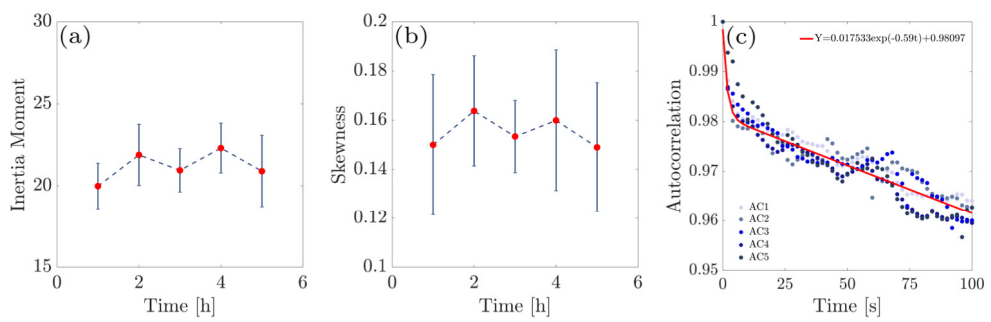

Figure S 3: (a) Average inertia moment over the THSPs associated with the sample in controlling experiment as a function of time. (b) Average skewness of 100 speckle patterns of the controlling experiment as a function of time. (c) Autocorrelation as a function of time for the controlling sample.

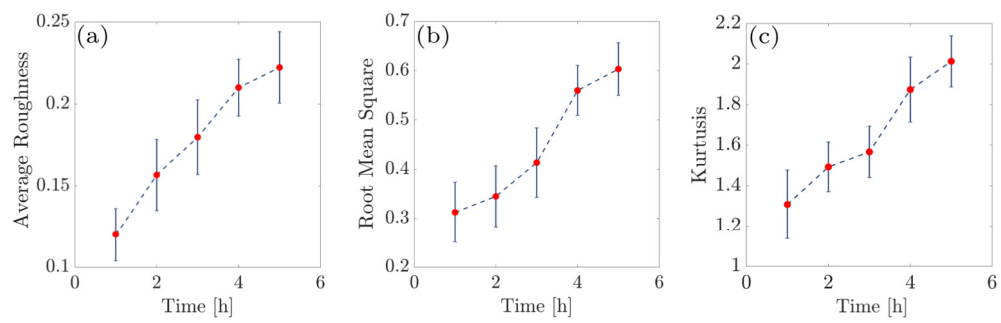

Figure S4: (a) Average roughness, (b) root mean square, and (c) kurtosis parameters of the samples.
